# Supplementary material for: How the Colourless ‘Nonfluorescent’ Chlorophyll Catabolites Rust
Source: PubMed Central journal article supplement (PMC3072522; doi:10.1002/chem.201003313), 2011-02-18
Supplement: chem0017-2330-SD1.pdf [file chem0017-2330-SD1.pdf]

# **CHEMISTRY**

---

## **A EUROPEAN JOURNAL**

---

### Supporting Information

© Copyright Wiley-VCH Verlag GmbH & Co. KGaA, 69451 Weinheim, 2011

#### **How the Colourless ‘Nonfluorescent’ Chlorophyll Catabolites Rust**

**Markus Ulrich, Simone Moser, Thomas Müller, and Bernhard Kräutler\*<sup>[a]</sup>**

chem\_201003313\_sm\_miscellaneous\_information.pdf

**Experimental Part.**

*General.* Solvents for extractions were reagent-grade commercials and distilled before use. HPLC grade methanol (MeOH) was from Merck (Darmstadt, Germany) and Acros Organics (Geel, Belgium). Dichloromethane (MeCl<sub>2</sub>), potassium dihydrogen phosphate puriss p.a., potassium phosphate dibasicanhydrous puriss.p.a. and 2,3-Dichloro-5,6-dicyano-1,4-benzoquinone purum (DDQ) were from Fluka (Buchs, Switzerland). Hexane pure was from Acros Organics (Geel, Belgium). Samples of *Cj*-NCC-1 (**1**) and *Cj*-YCC-2 (**2a**) were prepared as described earlier. <sup>[S1]</sup> Sep-Pak-C18 Cartridges were obtained from Waters Associates. pH values were measured with a WTW Sentix 21 electrode connected to a WTW pH535 digital pH meter.

*Spectroscopy.* UV/VIS: HITACHI U-3000 spectrophotometer;  $\lambda_{\max}$  in nm (rel.  $\epsilon$ ). CD: JASCO J-715 spectropolarimeter;  $\lambda_{\max}$  and  $\lambda_{\min}$  in nm (relative  $\Delta\epsilon$ ). <sup>1</sup>H-NMR: Varian UNITYplus 500;  $\delta$  in ppm with  $\delta(\text{CHD}_2\text{OD}) = 3.39$  ppm and  $\delta(\text{CHD}_2\text{CN}) = 1.94$  ppm;  $J_{\text{HH}}$ (Hz). <sup>13</sup>C-NMR (125 MHz, Varian UNITYplus 500): signal assignment from <sup>1</sup>H, <sup>13</sup>C-heteronuclear HSQC and HMBC experiments <sup>[S2]</sup>. MS: MAT 95 double focusing sector field instrument with fast atom bombardment (FAB) or electrospray ionization (ESI) source; FAB: positive ion mode, (caesium ions at 20 keV, 2  $\mu\text{A}$ ), matrix: glycerine, m/z (rel. int. in %). ESI: pos. ions, flow rate 2 mlmin<sup>-1</sup>, spray voltage 3.0 kV, solvent water/MeOH 1:1 (v/v).

*Chromatography.* TLC. Silica gel plates POLYGRAM Sil G / UV<sub>254</sub>, Macherey-Nagel (Düren, Germany). HPLC. solvents: solvent A = 100 mM potassium phosphate buffer (pH 7.0), solvent B = MeOH, C = water. Analytical HPLC (injection volume: 100  $\mu\text{l}$  or as specified in the text) 250 x 4.6 mm column, flow rate 0.5 ml.min<sup>-1</sup>. Solvent composition: 0-3 min: A : B 80:20 (v/v); 3-7 min: constant gradient of A : B from 80:20 to 40:60 (v/v); 7-25 min: A : B 40:60 (v/v); 25-27 min: linear change from A : B 40:60 to B : C 60:40 (v/v); 27-31 min: linear change from B : C 60:40 to 100:0 (v/v); 31-41 min: B : C 100:0 (v/v); 41-49 min: linear change from B : C 100:0 to 20:80 (v/v); 49-53 min: linear change from B : C 20:80 to A : B 80:20 (v/v). Semi-preparative HPLC (2 ml injection volume, 21.6 mm column, flow rate 5 ml.min<sup>-1</sup>), solvent composition: 0-10 min: A : B 80:20 (v/v); 10-40 min: constant gradient of A : B from 80:20 to 40:60 (v/v). MPLC, as described. <sup>[S1]</sup>

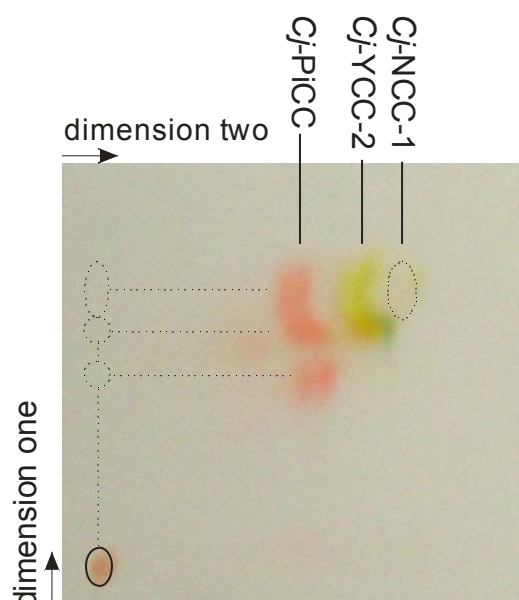

Figure S1: 2-D TLC analysis of the rust formation from the NCC **1**: 0.1 mg *Cj*-NCC-1 was dissolved in 1 ml of MeOH. A sample of 18  $\mu$ l was spotted on a TLC plate (4 x 4 cm), which was stored for 2 minutes at room temperature and at day light. An analytical trace was developed in one dimension (solvent composition: CHCl<sub>3</sub>/MeOH 85/15 (v/v)). The TLC plate was exposed to day light for 3 minutes. The plate then was developed in the second dimension (same solvent composition).

*Synthesis of Cj-PiCC by DDQ-oxidation of Cj-YCC-2.* 25.5 mg (09.7  $\mu$ mol) of a *Cj*-YCC-2 (**2a**) sample were dissolved in 12 ml of acetone. 8.8 mg of DDQ (1 molequivalent) were dissolved in 5 ml acetone. Both solutions were first flushed with argon for 1 minute and cooled in an N<sub>2</sub>(l)/ethanol bath to  $-45^{\circ}\text{C}$ . The DDQ solution was directly injected by a syringe into *Cj*-YCC-2 (**2a**) solution. The deep red reaction mixture was stirred in the freezing mixture under argon for 2 h; during this time the temperature gradually increased to  $-21.1^{\circ}\text{C}$ . The reaction mixture was diluted with 400 ml 100 mM potassium phosphate buffer (pH 7.0) and was desalted by using a SepPak cartridge. The products were eluted with 50 ml CH<sub>3</sub>OH and the sample was dried to give 25.1 mg of raw product.

The raw sample was dissolved by 20 ml CH<sub>3</sub>OH and diluted with 80 ml 100 mM potassium phosphate buffer (pH 7.0). The deep red solution was applied to an MPLC system. The fractions containing *Cj*-PiCC (**3**) were collected and their volume was reduced to 40 %, using a rotary evaporator. The remaining mixture was diluted with an equal amount of water and applied to a SepPak cartridge. It was first desalted by washing with water and the red fraction of **3** was then eluted with 50 ml of methanol. The solvent was evaporated and the residue was dried in vacuo to give 9.2 mg (36.2 % yield) of *Cj*-PiCC (**3**).

**Spectroscopic data.**

**Cj-YCC-1 (2b).** <sup>1</sup>H-NMR: (500 MHz, CD<sub>3</sub>OD, see Figure S2): δ [ppm] = 1.67 (s, (H<sub>3</sub>C(2<sup>1</sup>))), 2.03 (s, H<sub>3</sub>C(12<sup>1</sup>)), 2.15 (s, H<sub>3</sub>C(18<sup>1</sup>)), 2.26 (s, H<sub>3</sub>C(7<sup>1</sup>)), 2.37 (m, H<sub>2</sub>C(17<sup>2</sup>)), 2.68 (m, H<sub>2</sub>C(8<sup>1</sup>)), superimposed by 2.70 (m, H<sub>A</sub>C(17<sup>1</sup>)), 2.80 (m, H<sub>B</sub>C(17<sup>1</sup>)), 3.51 (m, H<sub>2</sub>C(8<sup>2</sup>)), 3.76 (s, H<sub>3</sub>C(13<sup>5</sup>)), 3.95 (s, H<sub>2</sub>C(10)), 4.98 (s, HC(15)), 5.38 (dd, J = 2.5/11.5 Hz, H<sub>A</sub>C(3<sup>2</sup>)), 6.15 (dd broad, J = 2.5/18 Hz, H<sub>B</sub>C(3<sup>2</sup>)), 6.51 (dd, J = 12/17.5 Hz, HC(3<sup>1</sup>)), 9.42 (s, HC(5)). <sup>13</sup>C-NMR: (125 MHz, CD<sub>3</sub>OD, see Figure S2): δ [ppm] = 9.29 (12<sup>1</sup>), 9.39 (7<sup>1</sup>), 9.59 (18<sup>1</sup>), 12.2 (2<sup>1</sup>), 22.1 (17<sup>1</sup>), 23.5 (10), 27.8 (8<sup>1</sup>), 37.0 (15), 40.1 (17<sup>2</sup>), 52.1 (13<sup>5</sup>), 62.6 (8<sup>2</sup>), 107.9 (20), 112.5 (12), 119.3 (3<sup>2</sup>), 121.1 (8), 123.2 (17), 124.0 (13), 124.7 (19), 127.0 (3<sup>1</sup>), 129.4 (16), 129.6 (3), 129.6 (6), 134.6 (11), 137.1 (1), 138.4 (9), 140.5 (2), 161.4 (14), 171.6 (13<sup>3</sup>), 182.3 (17<sup>3</sup>).

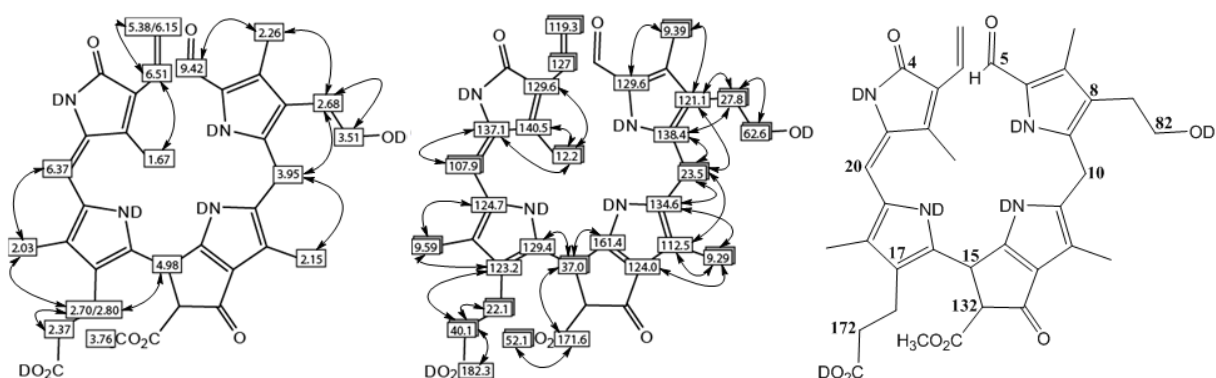

Figure S2: Graphical representations of <sup>1</sup>H- and <sup>13</sup>C chemical shift data (500 MHz spectra, in CD<sub>3</sub>OD), 2D-correlations and deduced constitutional formula of *Cj*-YCC-1 (**2b**). Left: ROESY-correlations; centre: assignments due to <sup>1</sup>J correlations from <sup>1</sup>H-<sup>13</sup>C-HSQC spectra (shaded boxes), and from <sup>1</sup>H-<sup>13</sup>C-long range couplings from HMBC-spectra, arrows, see e.g. [S2]; right: constitutional formula of *Cj*-YCC-1 (**2b**). Atom numbering, as recommended by IUPAC for chlorophyll derivatives, see e.g. [S3].

**Cj-PiCC (3):** <sup>1</sup>H-NMR (500 MHz, CD<sub>3</sub>OD): δ [ppm] = 2.12 (s, H<sub>3</sub>C(12<sup>1</sup>)), 2.14 (s, H<sub>3</sub>C(18<sup>1</sup>)), 2.22 (s, H<sub>3</sub>C(2<sup>1</sup>)), 2.29 (s, H<sub>3</sub>C(7<sup>1</sup>)), 2.42 (m, H<sub>2</sub>C(17<sup>2</sup>)), 2.69 (m, H<sub>2</sub>C(8<sup>1</sup>)), 3.13 (m, H<sub>2</sub>C(17<sup>1</sup>)), 3.50 (m, H<sub>2</sub>C(8<sup>2</sup>)), 3.76 (s, H<sub>3</sub>C(13<sup>5</sup>)), 4.24 (s, H<sub>2</sub>C(10)), 5.50 (dd, J = 2.2/12.0 Hz, H<sub>A</sub>C(3<sup>2</sup>)), 6.14 (HC(20)), 6.33 (dd, J = 2.2/17.6 Hz, H<sub>B</sub>C(3<sup>2</sup>)), 6.65 (dd, J = 12.0/17.6 Hz, HC(3<sup>1</sup>)), 9.45 (s, HC(5)). <sup>13</sup>C-NMR (125 MHz, CD<sub>3</sub>OD): δ [ppm] = 7.98 (2<sup>1</sup>), 7.75 (7<sup>1</sup>), 8.27 (18<sup>1</sup>), 22.9 (10), 26.7 (17<sup>2</sup>), 26.8 (8<sup>1</sup>), 52.0 (13<sup>5</sup>), 62.8 (8<sup>2</sup>), 98.4 (20), 115.3 (12), 120.1 (8), 126.0 (3<sup>2</sup>), 128.6 (1), 127.9 (3<sup>1</sup>), 124.2 (17), 128.5 (6), 136.3 (7), 136.5 (11), 137.0 (19), 141.3 (2), 144.3 (9).

<sup>1</sup>H-NMR: (500 MHz, CD<sub>3</sub>CN, see Figure S3): δ [ppm] = 2.09 (s, H<sub>3</sub>C(18<sup>1</sup>)), 2.18 (s, H<sub>3</sub>C(2<sup>1</sup>)), 2.24 (s, H<sub>3</sub>C(7<sup>1</sup>)), 2.26 (H<sub>2</sub>C(17<sup>2</sup>)), 2.27 (s, H<sub>3</sub>C(12<sup>1</sup>)), 2.68 (H<sub>2</sub>C(8<sup>1</sup>)), 3.08 (H<sub>2</sub>C(17<sup>1</sup>)), 3.49 (H<sub>2</sub>C(8<sup>2</sup>)), 3.69 (s, H<sub>3</sub>C(13<sup>5</sup>)), 4.08 (s, H<sub>2</sub>C(10)), 4.98 (s, HC(13<sup>2</sup>)), 5.49 (dd, J = 2.2/11.7 Hz, H<sub>A</sub>C(3<sup>2</sup>)), 6.06 (HC(20)), 6.33 (dd, J = 2.2/17.6 Hz, H<sub>B</sub>C(3<sup>2</sup>)), 6.66 (dd, J = 11.7/17.6 Hz, HC(3<sup>1</sup>)), 9.51 (HC(5)), 10.03 (HN(21)), 12.3 (HOOC(17<sup>3</sup>)). <sup>13</sup>C-NMR: (125 MHz, CD<sub>3</sub>CN, see Figure S3): δ [ppm] = 8.74 (7<sup>1</sup>), 9.48 (2<sup>1</sup>), 9.48 (12<sup>1</sup>), 9.48 (18<sup>1</sup>), 23.5 (10), 25.1 (17<sup>1</sup>),

28.4 (8<sup>1</sup>), 40.6 (17<sup>2</sup>), 52.3 (13<sup>5</sup>), 62.8 (8<sup>2</sup>), 66.9 (13<sup>2</sup>), 98.9 (20), 115.8 (12), 120.6 (8), 121.1 (3<sup>2</sup>), 121.2 (3), 127.6 (3<sup>1</sup>), 128.2 (1), 129.5 (6), 129.5 (14), 135.9 (7), 136.7 (11), 137.8 (15), 138.4 (18), 142.1 (2), 142.4 (17), 144.2 (9), 146.3 (13), 147.4 (16), 166.5 (19), 170.6 (13<sup>3</sup>), 171.2 (4), 188.1 (13<sup>1</sup>)

MS (ESI pos., CH<sub>3</sub>OH/H<sub>2</sub>O 1:1 (v/v), spray voltage 1.2 kV): m/z (%) = 456.06 (25, [M-CH<sub>3</sub>OH-ring B+H]<sup>+</sup>), 488.13 (15 [M-ring B+H]<sup>+</sup>), 609.09 (15, [M-CH<sub>3</sub>OH+H]<sup>+</sup>), 641.12 (100, [M+H]<sup>+</sup>), 663.25 (25, [M+Na]<sup>+</sup>), 686.09 (15, [M-H+2Na]<sup>+</sup>), 701.12 (20, [M-H+Na+K]<sup>+</sup>).

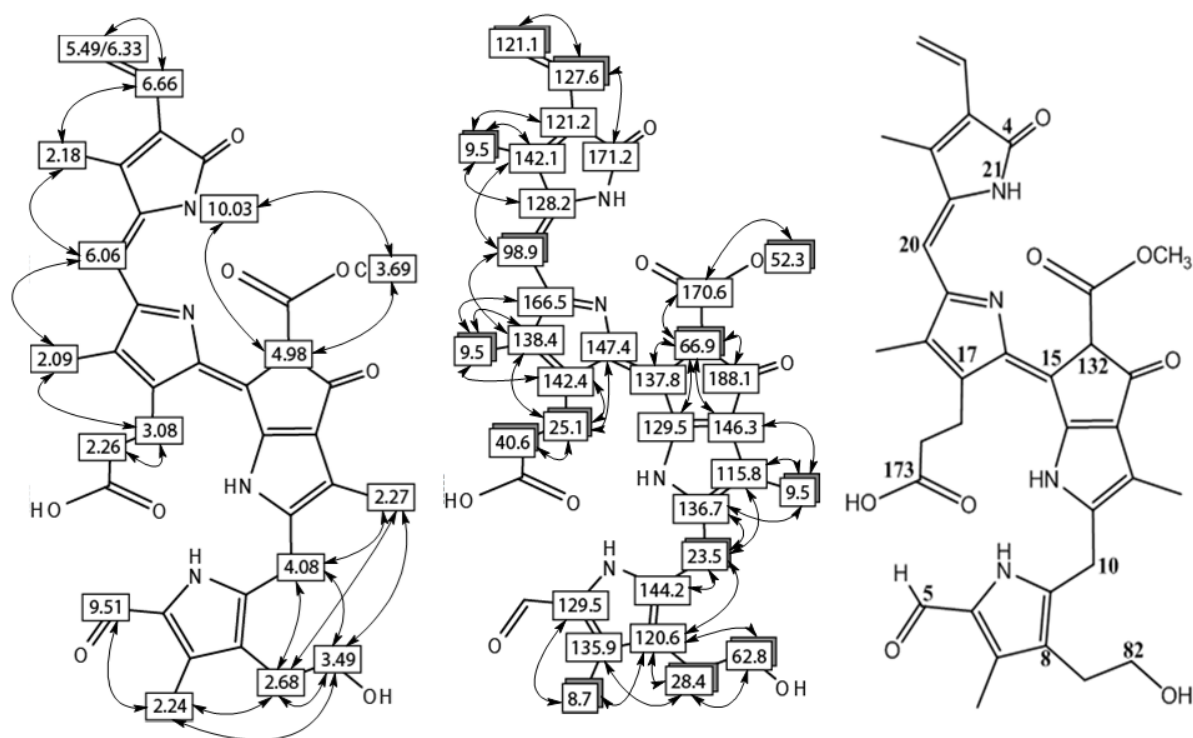

Figure S3: Graphical representations of <sup>1</sup>H- and <sup>13</sup>C chemical shift data (500 MHz spectra, in CD<sub>3</sub>CN), 2D-correlations and deduced constitutional formula of *Cj*-PiCC (**3**). Left: ROESY-correlations; centre: assignments due to <sup>1</sup>J correlations from <sup>1</sup>H-<sup>13</sup>C-HSQC spectra (shaded boxes), and from <sup>1</sup>H-<sup>13</sup>C-long range couplings, from HMBC-spectra, arrows, see e.g. [S21], right: constitutional formula of *Cj*-PiCC (**3**). Atom numbering, as recommended by IUPAC for chlorophyll derivatives, see e.g. [S31].

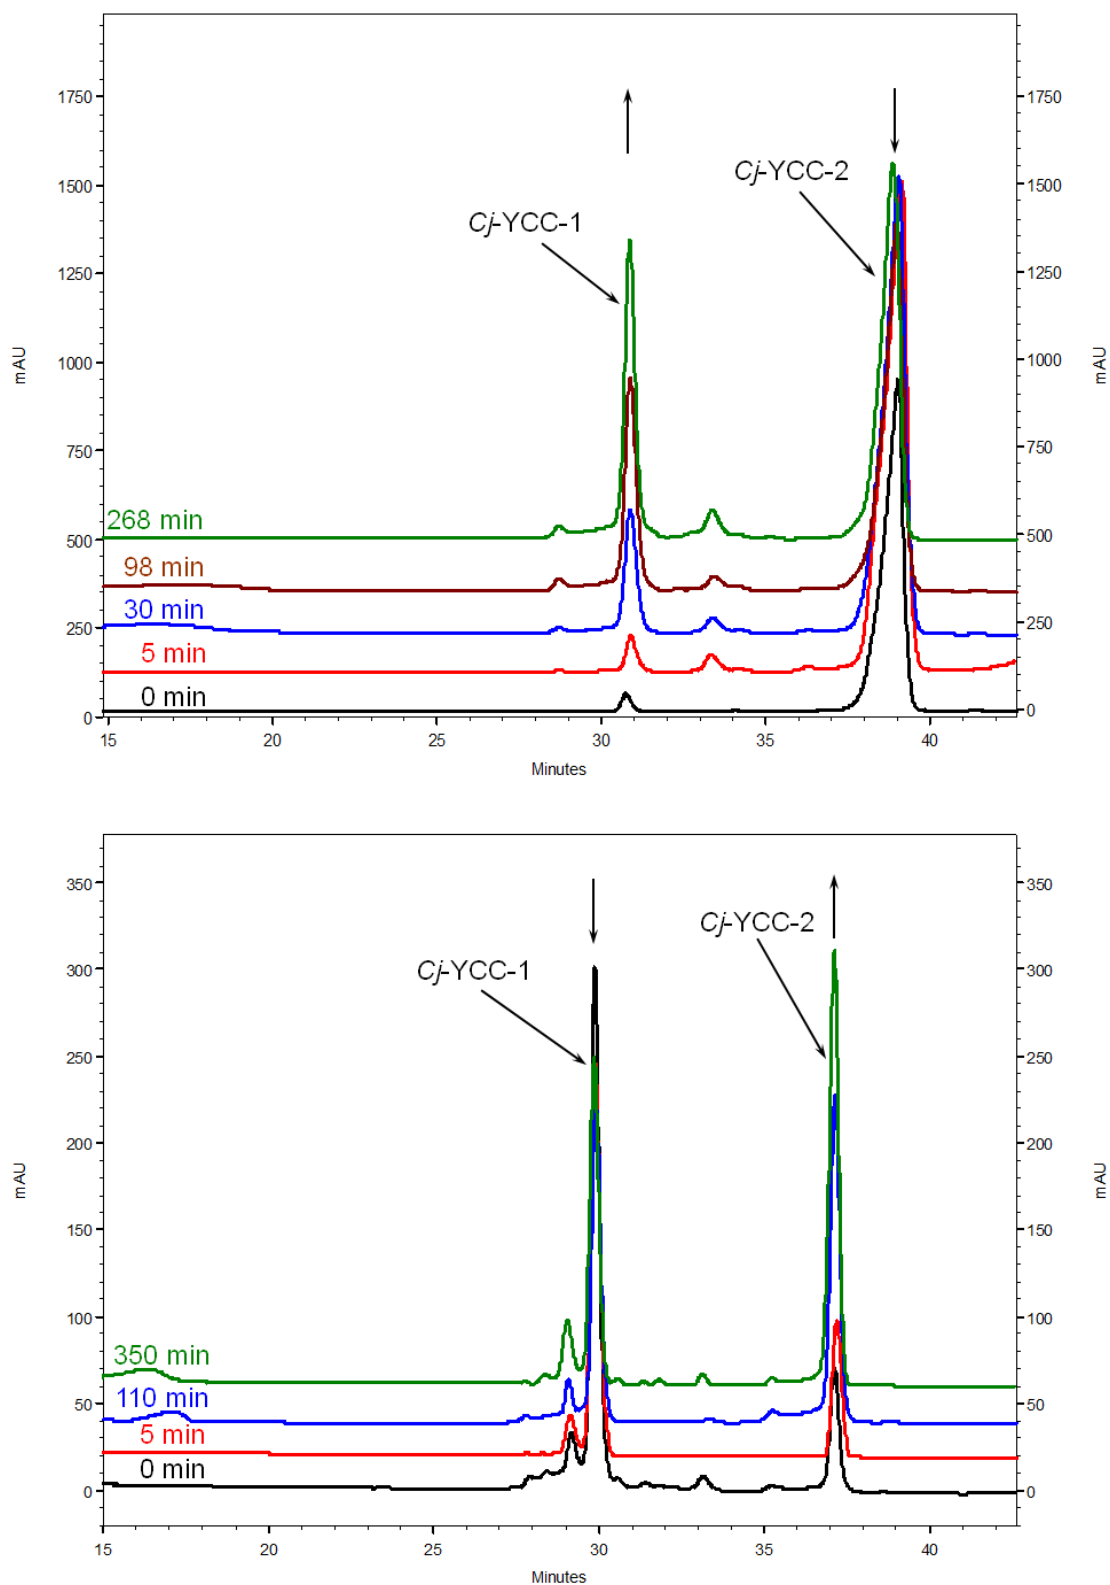

Figure S4: Analytical investigations of the photo-isomerization of YCCs by HPLC. Samples of *Cj*-YCC-2 (**2a**), at top, and of *Cj*-YCC-1 (**2b**), at bottom, were dissolved in MeOH / MeCl<sub>2</sub>, (1:15), the solutions were purged with Ar and then exposed to irradiation with day light at room temperature; samples were taken at indicated times; analytical HPLC, optical detection at 320 nm. Top. *Cj*-YCC-2 (**2a**) is partially transformed into *Cj*-YCC-1 (**2b**); bottom. *Cj*-YCC-1 (**2b**) is partially transformed into *Cj*-YCC-2 (**2a**).

## Kräutler-et-al-SuppInf

*Preparative photoisomerization of Cj-YCC-2 (2a).* A sample of 38.6 mg *Cj*-YCC-2 (**2a**, 60.1  $\mu\text{mol}$ ) was dissolved in 2 ml MeOH and 10 ml acid free MeCl<sub>2</sub>, and the solution was flushed with argon for 1 min. The deep yellow solution was stirred at r.t. and in the presence of day light for a total of 22 h. The solvent was evaporated in vacuo, to give 38.2 mg of a raw yellow residue. This was dissolved in 6 ml MeOH and 28 ml 100 mM potassium phosphate buffer (pH 7.0) were added. The orange solution was applied to the MPLC system. The fractions containing *Cj*-YCC-1 and *Cj*-YCC-2 were collected and partially concentrated to about 40% volume under reduced pressure. For desalting, they were then separately applied to a SepPak cartridge, washed with water and eluted with 50 ml MeOH. The solvent was evaporated and the residues were dried in vacuo to give 8.7 mg *Cj*-YCC-1 (**2b**, 13.5  $\mu\text{mol}$  = 22.5% yield) and 22.4 mg *Cj*-YCC-2 (**2a**, 34.9  $\mu\text{mol}$  = 58.1% yield).

## References

- [S1] S. Moser, M. Ulrich, T. Müller and B. Kräutler, *Photochem. Photobiol. Sci.* **2008**, 7, 1577-1581.
- [S2] H. Kessler, M. Gehrke and C. Griesinger, *Angew Chem Int Ed* **1988**, 27, 490-536.
- [S3] H. Scheer in *Chlorophylls*, (Ed. H. Scheer), CRC Press, Boca Raton, USA, **1991**, pp. 3-30.
